# Supplementary material for: Multi-Omics of Familial Thoracic Aortic Aneurysm and Dissection: Calcium Transport Impairment Predisposes Aortas to Dissection
Source: MDPI journal article supplement (doi:10.3390/ijms242015213), 2023-10-16
Supplement: s1 [file s1]

*Supplementary information*  
*for*

**Multi-Omics of Familial Thoracic Aortic Aneurysm  
and Dissection: Calcium Transport Impairment  
Predisposes Aortas to Dissection**

Shotu Tomida <sup>1</sup>, Tamaki Ishima <sup>1</sup>, Daigo Sawaki <sup>1</sup>, Yasushi Imai <sup>1</sup>, Ryoza Nagai <sup>2</sup>  
and Kenichi Aizawa <sup>1,3,4,\*</sup>

<sup>1</sup> Division of Clinical Pharmacology, Department of Pharmacology, Jichi Medical University, Shimotsuke 329-0498, Tochigi, Japan; stomida@jichi.ac.jp (S.T.); ishima.tamaki@jichi.ac.jp (T.I.); sawaki@jichi.ac.jp (D.S.); imaiy@jichi.ac.jp (Y.I.)

<sup>2</sup> Jichi Medical University, Shimotsuke 329-0498, Tochigi, Japan; rnagai@jichi.ac.jp

<sup>3</sup> Clinical Pharmacology Center, Jichi Medical University Hospital, Shimotsuke 329-0498, Tochigi, Japan

<sup>4</sup> Division of Translational Research, Clinical Research Center, Jichi Medical University Hospital, Shimotsuke 329-0498, Tochigi, Japan

\* Correspondence: aizawa@jichi.ac.jp; Tel.: +81-(0)285-58-7388

**Supplementary Table S1.** Relative expression of genes in *Myh11*<sup>ΔK/ΔK</sup> aortas, deletion of which predisposes mice to FTAAD. log<sub>2</sub> fold change = log<sub>2</sub> of relative expression normalized by expression in wild type aortas. Adjusted p-value = p-values adjusted for multiple testing, determined by the Benjamini and Hochberg method.

| Gene           | log <sub>2</sub> fold change | p-value | adjusted p-value |
|----------------|------------------------------|---------|------------------|
| <i>Acta2</i>   | 1.03                         | 1.22E-4 | 0.002            |
| <i>Col3a1</i>  | 0.38                         | 0.155   | 0.434            |
| <i>Fbn1</i>    | 1.00                         | 1.89E-5 | 0.001            |
| <i>Lox</i>     | 1.21                         | 2.23E-8 | 2.52E-6          |
| <i>Mylk</i>    | 1.08                         | 9.46E-5 | 0.002            |
| <i>Prkg1</i>   | 1.16                         | 3.21E-9 | 5.36E-7          |
| <i>Smad3</i>   | 0.15                         | 0.398   | 0.700            |
| <i>Tgfb2</i>   | -0.26                        | 0.417   | 0.714            |
| <i>Tgfbr1</i>  | 0.52                         | 0.022   | 0.128            |
| <i>Tgfbr2</i>  | 0.08                         | 0.601   | 0.833            |
| <i>Efemp2</i>  | 0.32                         | 0.213   | 0.518            |
| <i>Eln</i>     | 0.63                         | 0.030   | 0.155            |
| <i>Emilin1</i> | 0.34                         | 0.127   | 0.389            |
| <i>Flna</i>    | 0.65                         | 0.012   | 0.084            |
| <i>Mfap5</i>   | -0.29                        | 0.201   | 0.501            |

**Supplementary Table S2.** Relative expression of genes involved in the tricarboxylic acid cycle in *Myh11*<sup>ΔK/ΔK</sup> aortas. log<sub>2</sub> fold change = log<sub>2</sub> of relative expression normalized by expression in wild type aortas. Adjusted p-value = p-values adjusted for multiple testing, determined by the Benjamini and Hochberg method.

| Gene          | log <sub>2</sub> fold change | p-value | adjusted p-value |
|---------------|------------------------------|---------|------------------|
| <i>Aco1</i>   | -0.34                        | 0.309   | 0.623            |
| <i>Aco2</i>   | -0.63                        | 0.101   | 0.338            |
| <i>Cs</i>     | -0.51                        | 0.121   | 0.377            |
| <i>Dld</i>    | -0.20                        | 0.517   | 0.784            |
| <i>Dlst</i>   | -0.48                        | 0.147   | 0.423            |
| <i>Fh1</i>    | -0.37                        | 0.236   | 0.545            |
| <i>Idh1</i>   | -0.60                        | 0.025   | 0.140            |
| <i>Idh2</i>   | -0.67                        | 0.006   | 0.052            |
| <i>Idh3a</i>  | -0.48                        | 0.145   | 0.420            |
| <i>Idh3b</i>  | -0.41                        | 0.179   | 0.471            |
| <i>Idh3g</i>  | -0.37                        | 0.221   | 0.526            |
| <i>Mdh1</i>   | -0.28                        | 0.142   | 0.413            |
| <i>Mdh1b</i>  | -1.56                        | 0.593   | NA               |
| <i>Mdh2</i>   | -0.30                        | 0.246   | 0.559            |
| <i>Ogdh</i>   | -0.46                        | 0.157   | 0.437            |
| <i>Sdha</i>   | -0.39                        | 0.221   | 0.526            |
| <i>Sdhaf1</i> | -0.57                        | 0.017   | 0.105            |

|               |       |       |       |
|---------------|-------|-------|-------|
| <i>Sdhaf2</i> | 0.08  | 0.595 | 0.830 |
| <i>Sdhaf3</i> | -0.25 | 0.224 | 0.530 |
| <i>Sdhaf4</i> | -0.21 | 0.228 | 0.536 |
| <i>Sdhb</i>   | -0.58 | 0.048 | 0.213 |
| <i>Sdhc</i>   | -0.13 | 0.561 | 0.813 |
| <i>Sdhd</i>   | -0.47 | 0.087 | 0.310 |
| <i>Sucla2</i> | -0.41 | 0.190 | 0.486 |
| <i>Suclg1</i> | -0.44 | 0.148 | 0.424 |
| <i>Suclg2</i> | 0.08  | 0.708 | 0.887 |

**Supplementary Table S3.** Relative expression of inflammatory cytokine genes in *Myh11*<sup>ΔK/ΔK</sup> aortas previously shown to increase in FTAAD.<sup>1,2</sup> log<sub>2</sub> fold change = log<sub>2</sub> of relative expression normalized by expression in wild-type aortas. Adjusted p-value = p-values adjusted for multiple testing, determined by the Benjamini and Hochberg method.

| Gene        | log <sub>2</sub> fold change | p-value | adjusted p-value |
|-------------|------------------------------|---------|------------------|
| <i>Ccl3</i> | 0.16                         | 0.909   | NA               |
| <i>Ccl4</i> | 0.18                         | 0.903   | NA               |
| <i>Igf1</i> | -0.52                        | 0.010   | 0.075            |
| <i>Mmp2</i> | 0.05                         | 0.826   | 0.937            |
| <i>Mmp9</i> | 0.30                         | 0.346   | 0.657            |

**Supplementary Table S4.** Relative expression of spectrin genes in *Myh11*<sup>ΔK/ΔK</sup> aortas. log<sub>2</sub> fold change = log<sub>2</sub> of relative expression normalized by expression in wild-type aortas. Adjusted p-value = p-values adjusted for multiple testing, determined by the Benjamini and Hochberg method.

| Gene          | log <sub>2</sub> fold change | p-value | adjusted p-value |
|---------------|------------------------------|---------|------------------|
| <i>Spta1</i>  | 1.12                         | 0.470   | NA               |
| <i>Sptan1</i> | 0.02                         | 0.885   | 0.961            |
| <i>Sptb</i>   | -1.60                        | 0.007   | 0.058            |
| <i>Sptbn1</i> | -0.20                        | 0.079   | 0.291            |
| <i>Sptbn2</i> | -7.00                        | 0.000   | 0.000            |
| <i>Sptbn4</i> | -4.27                        | 0.000   | 0.003            |
| <i>Sptbn5</i> | 0.01                         | 0.989   | 0.995            |

**Supplementary Table S5.** Relative expression of calcium channel genes in *Myh11*<sup>ΔK/ΔK</sup> aortas. log<sub>2</sub> fold change = log<sub>2</sub> of relative expression normalized by expression in wild-type aortas. Adjusted p-value = p-values adjusted for multiple testing, determined by the Benjamini and Hochberg method.

| Gene           | log <sub>2</sub> fold change | p-value | adjusted p-value |
|----------------|------------------------------|---------|------------------|
| <i>Cacna1a</i> | -0.96                        | 0.007   | 0.055            |
| <i>Cacna1b</i> | -10.28                       | 2.60E-7 | 1.72E-5          |

|                 |       |         |         |
|-----------------|-------|---------|---------|
| <i>Cacna1c</i>  | 0.52  | 0.034   | 0.169   |
| <i>Cacna1d</i>  | 0.56  | 0.095   | 0.325   |
| <i>Cacna1e</i>  | -5.56 | 3.02E-6 | 1.21E-4 |
| <i>Cacna1f</i>  | 3.28  | 0.324   | NA      |
| <i>Cacna1g</i>  | 0.35  | 0.368   | 0.677   |
| <i>Cacna1h</i>  | -1.20 | 0.007   | 0.054   |
| <i>Cacna1i</i>  | -0.13 | 0.929   | NA      |
| <i>Cacna1s</i>  | -0.09 | 0.976   | NA      |
| <i>Cacna2d1</i> | -0.07 | 0.740   | 0.902   |
| <i>Cacna2d2</i> | -4.40 | 2.35E-6 | 1.00E-4 |
| <i>Cacna2d3</i> | -2.25 | 1.92E-7 | 1.37E-5 |
| <i>Cacna2d4</i> | 1.14  | 0.108   | 0.353   |
| <i>Cacnb1</i>   | -1.50 | 0.008   | 0.060   |
| <i>Cacnb2</i>   | 1.44  | 7.53E-9 | 1.03E-6 |
| <i>Cacnb3</i>   | -0.58 | 0.086   | 0.307   |
| <i>Cacnb4</i>   | -2.02 | 1.13E-4 | 0.002   |
| <i>Cacng1</i>   | -1.11 | 0.721   | NA      |
| <i>Cacng2</i>   | -8.93 | 0.022   | 0.128   |
| <i>Cacng3</i>   | -6.50 | 0.002   | 0.019   |
| <i>Cacng4</i>   | -1.42 | 0.060   | 0.247   |
| <i>Cacng5</i>   | -6.07 | 2.93E-7 | 1.91E-5 |
| <i>Cacng6</i>   | NA    | NA      | NA      |
| <i>Cacng7</i>   | 0.06  | 0.798   | 0.928   |
| <i>Cacng8</i>   | -2.93 | 0.170   | 0.458   |
| <i>Hcn1</i>     | -2.54 | 0.017   | 0.105   |
| <i>Hcn2</i>     | -2.50 | 0.000   | 0.001   |
| <i>Hcn3</i>     | -5.91 | 0.000   | 0.006   |
| <i>Hcn4</i>     | -3.32 | 0.001   | 0.014   |
| <i>Trpa1</i>    | NA    | NA      | NA      |
| <i>Trpc1</i>    | 0.12  | 0.515   | 0.783   |
| <i>Trpc2</i>    | NA    | NA      | NA      |
| <i>Trpc3</i>    | -0.09 | 0.871   | 0.956   |
| <i>Trpc4</i>    | -1.03 | 0.393   | 0.697   |
| <i>Trpc4ap</i>  | -0.07 | 0.621   | 0.841   |
| <i>Trpc5</i>    | -1.94 | 0.486   | NA      |
| <i>Trpc5os</i>  | NA    | NA      | NA      |
| <i>Trpc6</i>    | -2.11 | 0.029   | 0.153   |
| <i>Trpc7</i>    | -6.91 | 0.077   | 0.288   |
| <i>Trpd52l3</i> | NA    | NA      | NA      |
| <i>Trpm1</i>    | 0.06  | 0.976   | NA      |
| <i>Trpm2</i>    | -3.35 | 8.57E-5 | 0.002   |
| <i>Trpm3</i>    | -0.57 | 0.067   | 0.263   |
| <i>Trpm4</i>    | 0.16  | 0.495   | 0.768   |
| <i>Trpm5</i>    | 1.30  | 0.448   | NA      |
| <i>Trpm6</i>    | -0.21 | 0.798   | 0.927   |

|              |       |       |       |
|--------------|-------|-------|-------|
| <i>Trpm7</i> | 0.24  | 0.128 | 0.391 |
| <i>Trpm8</i> | -0.29 | 0.920 | NA    |
| <i>Trps1</i> | 0.10  | 0.547 | 0.803 |
| <i>Trpt1</i> | -0.29 | 0.150 | 0.428 |
| <i>Trpv1</i> | -0.63 | 0.276 | 0.588 |
| <i>Trpv2</i> | -0.35 | 0.152 | 0.430 |
| <i>Trpv3</i> | -1.62 | 0.253 | 0.566 |
| <i>Trpv4</i> | 0.69  | 0.003 | 0.030 |
| <i>Trpv5</i> | -1.11 | 0.785 | NA    |
| <i>Trpv6</i> | -1.11 | 0.785 | NA    |

**Supplementary Table S6.** Relative expression of genes related to Ca<sup>2+</sup> release from sarcoplasmic reticulum in *Myh11*<sup>ΔK/ΔK</sup> aortas. log<sub>2</sub> fold change = log<sub>2</sub> of relative expression normalized by expression in wild type aortas. Adjusted p-value = p-values adjusted for multiple testing, determined by the Benjamini and Hochberg method.

| Gene          | log <sub>2</sub> fold change | p-value | adjusted p-value |
|---------------|------------------------------|---------|------------------|
| <i>Atp2a1</i> | 1.63                         | 0.236   | 0.546            |
| <i>Atp2a2</i> | 0.52                         | 0.002   | 0.023            |
| <i>Atp2a3</i> | 0.19                         | 0.452   | 0.741            |
| <i>Atp2b1</i> | 0.15                         | 0.315   | 0.630            |
| <i>Atp2b2</i> | -1.54                        | 1.31E-7 | 1.02E-5          |
| <i>Atp2b3</i> | -7.10                        | 0.001   | 0.007            |
| <i>Atp2b4</i> | -0.09                        | 0.575   | 0.820            |
| <i>Orai1</i>  | 0.21                         | 0.255   | 0.568            |
| <i>Orai2</i>  | -0.59                        | 0.139   | 0.409            |
| <i>Orai3</i>  | 0.36                         | 0.046   | 0.206            |
| <i>Stim1</i>  | 0.08                         | 0.583   | 0.824            |
| <i>Stim2</i>  | 0.05                         | 0.743   | 0.903            |
| <i>Itpr1</i>  | 0.62                         | 0.006   | 0.051            |
| <i>Itpr2</i>  | -0.60                        | 0.081   | 0.296            |
| <i>Itpr3</i>  | -0.10                        | 0.575   | 0.820            |

**Supplementary Table S7.** Relative expression of ADP-ribose polymerase genes in *Myh11*<sup>ΔK/ΔK</sup> aortas. log<sub>2</sub> fold change = log<sub>2</sub> of relative expression normalized by expression in wild type aortas. Adjusted p-value = p-values adjusted for multiple testing, determined by the Benjamini and Hochberg method.

| Gene         | log <sub>2</sub> fold change | p-value | adjusted p-value |
|--------------|------------------------------|---------|------------------|
| <i>Parp1</i> | -0.11                        | 0.445   | 0.737            |
| <i>Parp2</i> | 0.18                         | 0.330   | 0.643            |
| <i>Parp3</i> | 0.10                         | 0.564   | 0.814            |
| <i>Parp4</i> | -0.36                        | 0.043   | 0.200            |
| <i>Parp6</i> | -0.57                        | 0.005   | 0.042            |

|               |       |         |         |
|---------------|-------|---------|---------|
| <i>Parp8</i>  | 0.32  | 0.129   | 0.391   |
| <i>Parp9</i>  | -0.14 | 0.360   | 0.671   |
| <i>Parp10</i> | -0.50 | 0.031   | 0.160   |
| <i>Parp11</i> | -0.50 | 0.157   | 0.437   |
| <i>Parp12</i> | -0.12 | 0.452   | 0.741   |
| <i>Parp14</i> | -0.27 | 0.152   | 0.431   |
| <i>Parp16</i> | -1.04 | 0.001   | 0.007   |
| <i>Tiparp</i> | -0.51 | 0.036   | 0.177   |
| <i>Sirt1</i>  | 0.22  | 0.187   | 0.482   |
| <i>Sirt2</i>  | -0.09 | 0.383   | 0.688   |
| <i>Sirt3</i>  | -0.30 | 0.135   | 0.402   |
| <i>Sirt4</i>  | 0.16  | 0.617   | 0.840   |
| <i>Sirt5</i>  | -0.26 | 0.268   | 0.581   |
| <i>Sirt6</i>  | -0.06 | 0.798   | 0.927   |
| <i>Sirt7</i>  | -0.11 | 0.488   | 0.764   |
| <i>CD38</i>   | -0.48 | 0.138   | 0.407   |
| <i>Sarm1</i>  | -4.13 | 9.66E-8 | 8.13E-6 |
| <i>Nmnat1</i> | -0.13 | 0.600   | 0.833   |
| <i>Nmnat2</i> | -3.44 | 0.000   | 0.007   |
| <i>Nmnat3</i> | -0.82 | 0.026   | 0.141   |
| <i>Nampt</i>  | -0.23 | 0.323   | 0.637   |

**Supplementary Table S8.** Relative expression of genes that convert NAD<sup>+</sup> to NADH in *Myh11*<sup>ΔK/ΔK</sup> aortas. log<sub>2</sub> fold change = log<sub>2</sub> of relative expression normalized by expression in wild type aortas. Adjusted p-value = p-values adjusted for multiple testing, determined by the Benjamini and Hochberg method.

| Gene         | log <sub>2</sub> fold change | p-value | adjusted p-value |
|--------------|------------------------------|---------|------------------|
| <i>Dlat</i>  | -0.16                        | 0.593   | 0.829            |
| <i>Dld</i>   | -0.20                        | 0.517   | 0.784            |
| <i>Dlst</i>  | -0.48                        | 0.147   | 0.423            |
| <i>Gapdh</i> | 0.30                         | 0.577   | 0.821            |
| <i>Idh2</i>  | -0.67                        | 0.006   | 0.052            |
| <i>Mdh1</i>  | -0.28                        | 0.142   | 0.413            |
| <i>Mdh1b</i> | -1.56                        | 0.593   | NA               |
| <i>Mdh2</i>  | -0.30                        | 0.246   | 0.559            |
| <i>Ogdh</i>  | -0.46                        | 0.157   | 0.437            |
| <i>Pdha1</i> | -0.03                        | 0.915   | 0.971            |
| <i>Pdha2</i> | NA                           | NA      | NA               |
| <i>Pdhb</i>  | 0.24                         | 0.427   | 0.724            |

**Supplementary Table S9.** Relative expression of genes involved in the electron transport chain in *Myh11*<sup>ΔK/ΔK</sup> aortas. log<sub>2</sub> fold change = log<sub>2</sub> of relative expression normalized by expression in wild type aortas. Adjusted p-value = p-values adjusted for multiple testing, determined by the Benjamini and Hochberg method.

| Gene           | log <sub>2</sub> fold change | p-value | adjusted p-value |
|----------------|------------------------------|---------|------------------|
| <i>Bcs1l</i>   | −0.25                        | 0.319   | 0.633            |
| <i>Coa3</i>    | −0.04                        | 0.832   | 0.940            |
| <i>Coa4</i>    | −0.45                        | 0.249   | 0.562            |
| <i>Coa5</i>    | −0.25                        | 0.337   | 0.649            |
| <i>Coa6</i>    | 0.09                         | 0.645   | 0.854            |
| <i>Coa7</i>    | −0.31                        | 0.267   | 0.580            |
| <i>Cox10</i>   | −0.61                        | 0.034   | 0.171            |
| <i>Cox11</i>   | 0.09                         | 0.641   | 0.852            |
| <i>Cox14</i>   | −0.31                        | 0.059   | 0.245            |
| <i>Cox15</i>   | −0.22                        | 0.281   | 0.594            |
| <i>Cox16</i>   | 0.10                         | 0.770   | 0.917            |
| <i>Cox17</i>   | −0.26                        | 0.265   | 0.577            |
| <i>Cox18</i>   | −0.21                        | 0.356   | 0.667            |
| <i>Cox19</i>   | 0.19                         | 0.348   | 0.659            |
| <i>Cox20</i>   | 0.08                         | 0.547   | 0.803            |
| <i>Cox4i1</i>  | −0.43                        | 0.060   | 0.246            |
| <i>Cox4i2</i>  | 0.27                         | 0.398   | 0.700            |
| <i>Cox5a</i>   | −0.54                        | 0.074   | 0.280            |
| <i>Cox5b</i>   | −0.29                        | 0.275   | 0.588            |
| <i>Cox6a1</i>  | −0.24                        | 0.299   | 0.613            |
| <i>Cox6a2</i>  | 2.07                         | 0.091   | 0.318            |
| <i>Cox6b1</i>  | −0.46                        | 0.076   | 0.285            |
| <i>Cox6b2</i>  | −0.24                        | 0.549   | 0.804            |
| <i>Cox6c</i>   | −0.08                        | 0.677   | 0.872            |
| <i>Cox7a1</i>  | −0.74                        | 0.053   | 0.227            |
| <i>Cox7a2</i>  | −0.16                        | 0.342   | 0.653            |
| <i>Cox7a2l</i> | 0.00                         | 0.978   | 0.992            |
| <i>Cox7b</i>   | −0.16                        | 0.483   | 0.761            |
| <i>Cox7b2</i>  | −1.11                        | 0.785   | NA               |
| <i>Cox7c</i>   | 0.14                         | 0.794   | 0.926            |
| <i>Cox8a</i>   | −0.26                        | 0.256   | 0.569            |
| <i>Cox8b</i>   | −0.63                        | 0.095   | 0.327            |
| <i>Cox8c</i>   | NA                           | NA      | NA               |
| <i>Cyc1</i>    | −0.47                        | 0.114   | 0.364            |
| <i>mt-Co1</i>  | −0.38                        | 0.073   | 0.279            |
| <i>mt-Co2</i>  | NA                           | NA      | NA               |
| <i>mt-Co3</i>  | −0.15                        | 0.970   | NA               |
| <i>mt-Cytb</i> | −0.31                        | 0.146   | 0.420            |
| <i>Ndufa1</i>  | −0.16                        | 0.434   | 0.729            |
| <i>Ndufa10</i> | −0.44                        | 0.166   | 0.451            |
| <i>Ndufa11</i> | −0.02                        | 0.895   | 0.965            |
| <i>Ndufa12</i> | −0.21                        | 0.284   | 0.597            |
| <i>Ndufa13</i> | −0.03                        | 0.864   | 0.954            |
| <i>Ndufa2</i>  | 0.11                         | 0.379   | 0.684            |

|                   |       |       |       |
|-------------------|-------|-------|-------|
| <i>Ndufa3</i>     | −0.24 | 0.263 | 0.576 |
| <i>Ndufa4</i>     | −0.17 | 0.406 | 0.706 |
| <i>Ndufa4l2</i>   | 0.06  | 0.821 | 0.935 |
| <i>Ndufa5</i>     | −0.19 | 0.304 | 0.619 |
| <i>Ndufa6</i>     | −0.04 | 0.785 | 0.923 |
| <i>Ndufa7</i>     | −0.19 | 0.256 | 0.569 |
| <i>Ndufa8</i>     | −0.36 | 0.102 | 0.342 |
| <i>Ndufa9</i>     | −0.42 | 0.116 | 0.368 |
| <i>Ndufab1</i>    | −0.11 | 0.751 | 0.907 |
| <i>Ndufab1-ps</i> | −1.11 | 0.785 | NA    |
| <i>Ndufaf1</i>    | −0.42 | 0.060 | 0.246 |
| <i>Ndufaf2</i>    | 0.08  | 0.695 | 0.881 |
| <i>Ndufaf3</i>    | −0.04 | 0.820 | 0.935 |
| <i>Ndufaf4</i>    | −0.08 | 0.631 | 0.847 |
| <i>Ndufaf5</i>    | −0.20 | 0.257 | 0.569 |
| <i>Ndufaf6</i>    | −0.26 | 0.355 | 0.666 |
| <i>Ndufaf7</i>    | −0.14 | 0.351 | 0.662 |
| <i>Ndufaf8</i>    | 0.09  | 0.598 | 0.832 |
| <i>Ndufb10</i>    | −0.38 | 0.065 | 0.258 |
| <i>Ndufb11</i>    | −0.18 | 0.359 | 0.670 |
| <i>Ndufb2</i>     | 0.04  | 0.798 | 0.927 |
| <i>Ndufb3</i>     | −0.03 | 0.869 | 0.955 |
| <i>Ndufb4</i>     | −0.28 | 0.204 | 0.505 |
| <i>Ndufb5</i>     | −0.25 | 0.250 | 0.563 |
| <i>Ndufb6</i>     | −0.25 | 0.319 | 0.633 |
| <i>Ndufb7</i>     | −0.20 | 0.218 | 0.523 |
| <i>Ndufb8</i>     | −0.22 | 0.371 | 0.679 |
| <i>Ndufb9</i>     | −0.32 | 0.178 | 0.469 |
| <i>Ndufc1</i>     | −0.22 | 0.271 | 0.583 |
| <i>Ndufc2</i>     | −0.30 | 0.143 | 0.415 |
| <i>Ndufs1</i>     | −0.29 | 0.324 | 0.637 |
| <i>Ndufs2</i>     | −0.25 | 0.385 | 0.690 |
| <i>Ndufs3</i>     | −0.35 | 0.192 | 0.489 |
| <i>Ndufs4</i>     | −0.09 | 0.660 | 0.864 |
| <i>Ndufs5</i>     | −0.03 | 0.917 | 0.971 |
| <i>Ndufs6</i>     | −0.21 | 0.305 | 0.619 |
| <i>Ndufs7</i>     | −0.51 | 0.036 | 0.175 |
| <i>Ndufs8</i>     | −0.35 | 0.154 | 0.433 |
| <i>Ndufv1</i>     | −0.47 | 0.144 | 0.419 |
| <i>Ndufv2</i>     | −0.29 | 0.200 | 0.500 |
| <i>Ndufv3</i>     | −0.28 | 0.160 | 0.443 |
| <i>Sco1</i>       | 0.01  | 0.951 | 0.983 |
| <i>Sco2</i>       | −0.44 | 0.195 | 0.492 |
| <i>Sdha</i>       | −0.39 | 0.221 | 0.526 |
| <i>Sdhaf1</i>     | −0.57 | 0.017 | 0.105 |



|                |       |       |       |
|----------------|-------|-------|-------|
| <i>Sdhaf2</i>  | 0.08  | 0.595 | 0.830 |
| <i>Sdhaf3</i>  | -0.25 | 0.224 | 0.530 |
| <i>Sdhaf4</i>  | -0.21 | 0.228 | 0.536 |
| <i>Sdhb</i>    | -0.58 | 0.048 | 0.213 |
| <i>Sdhc</i>    | -0.13 | 0.561 | 0.813 |
| <i>Sdhd</i>    | -0.47 | 0.087 | 0.310 |
| <i>Surf1</i>   | -0.09 | 0.487 | 0.763 |
| <i>Uqcc1</i>   | -0.61 | 0.012 | 0.086 |
| <i>Uqcc2</i>   | 0.03  | 0.842 | 0.944 |
| <i>Uqcc3</i>   | -0.31 | 0.109 | 0.354 |
| <i>Uqcr10</i>  | -0.16 | 0.454 | 0.742 |
| <i>Uqcr11</i>  | -0.26 | 0.269 | 0.582 |
| <i>Uqcrb</i>   | -0.01 | 0.956 | 0.985 |
| <i>Uqcrc1</i>  | -0.45 | 0.136 | 0.403 |
| <i>Uqcrc2</i>  | -0.26 | 0.365 | 0.674 |
| <i>Uqcrfs1</i> | -0.33 | 0.279 | 0.592 |
| <i>Uqcrh</i>   | 0.01  | 0.970 | 0.989 |
| <i>Uqcrq</i>   | -0.18 | 0.452 | 0.741 |

**Supplementary Table S10.** Relative expression of inwardly rectifying potassium channel genes in *Myh11*<sup>ΔK/ΔK</sup> aortas. log<sub>2</sub> fold change = log<sub>2</sub> of relative expression normalized by expression in wild type aortas. Adjusted p-value = p-values adjusted for multiple testing, determined by the Benjamini and Hochberg method.

| Gene          | log <sub>2</sub> fold change | p-value  | adjusted p-value |
|---------------|------------------------------|----------|------------------|
| <i>Kcnj1</i>  | NA                           | NA       | NA               |
| <i>Kcnj2</i>  | -0.75                        | 0.169    | 0.456            |
| <i>Kcnj3</i>  | -3.70                        | 0.002    | 0.018            |
| <i>Kcnj4</i>  | 0.06                         | 0.959    | 0.986            |
| <i>Kcnj5</i>  | 4.29                         | 0.033    | NA               |
| <i>Kcnj6</i>  | NA                           | NA       | NA               |
| <i>Kcnj8</i>  | 0.79                         | 0.004    | 0.035            |
| <i>Kcnj9</i>  | -5.03                        | 0.002    | 0.019            |
| <i>Kcnj10</i> | -4.61                        | 9.20E-07 | 4.80E-05         |
| <i>Kcnj11</i> | -0.44                        | 0.196    | 0.493            |
| <i>Kcnj12</i> | -2.05                        | 0.000    | 0.004            |
| <i>Kcnj13</i> | -6.39                        | 0.000    | 0.005            |
| <i>Kcnj14</i> | 2.15                         | 0.426    | NA               |
| <i>Kcnj15</i> | 0.32                         | 0.268    | 0.580            |
| <i>Kcnj16</i> | -6.59                        | 0.091    | 0.318            |
| <i>Kcna10</i> | NA                           | NA       | NA               |

**Supplementary Table S11.** Relative expression of voltage-gated potassium channel genes in *Myh11*<sup>ΔK/ΔK</sup> aortas. log<sub>2</sub> fold change = log<sub>2</sub> of relative expression normalized by expression in

wild type aortas. Adjusted p-value = p-values adjusted for multiple testing, determined by the Benjamini and Hochberg method.

| <b>Gene</b>   | <b>log<sub>2</sub> fold change</b> | <b>p-value</b> | <b>adjusted p-value</b> |
|---------------|------------------------------------|----------------|-------------------------|
| <i>Kcna1</i>  | -2.03                              | 2.98E-4        | 0.005                   |
| <i>Kcna2</i>  | -2.00                              | 1.05E-4        | 0.002                   |
| <i>Kcna3</i>  | -1.29                              | 0.275          | 0.588                   |
| <i>Kcna4</i>  | -6.01                              | 8.92E-4        | 0.011                   |
| <i>Kcna5</i>  | -0.34                              | 0.354          | 0.666                   |
| <i>Kcna6</i>  | -3.52                              | 9.70E-9        | 1.28E-6                 |
| <i>Kcna7</i>  | 0.78                               | 0.801          | NA                      |
| <i>Kcna10</i> | NA                                 | NA             | NA                      |
| <i>Kcnab1</i> | 0.91                               | 6.21E-4        | 0.008                   |
| <i>Kcnab2</i> | -3.03                              | 7.90E-06       | 2.58E-4                 |
| <i>Kcnab3</i> | -0.28                              | 0.619          | 0.840                   |
| <i>Kcnb1</i>  | 0.30                               | 0.191          | 0.487                   |
| <i>Kcnb2</i>  | -7.00                              | 6.11E-5        | 0.001                   |
| <i>Kcnc1</i>  | -5.04                              | 0.003          | 0.029                   |
| <i>Kcnc2</i>  | -0.32                              | 0.642          | 0.853                   |
| <i>Kcnc3</i>  | -1.55                              | 0.055          | 0.232                   |
| <i>Kcnc4</i>  | -0.58                              | 0.215          | 0.520                   |
| <i>Kcnd1</i>  | -1.36                              | 0.008          | 0.063                   |
| <i>Kcnd2</i>  | -2.11                              | 0.001          | 0.016                   |
| <i>Kcnd3</i>  | 0.49                               | 0.072          | 0.276                   |
| <i>Kcne1</i>  | NA                                 | NA             | NA                      |
| <i>Kcne1l</i> | -2.10                              | 0.057          | 0.237                   |
| <i>Kcne2</i>  | NA                                 | NA             | NA                      |
| <i>Kcne3</i>  | -0.11                              | 0.847          | 0.946                   |
| <i>Kcne4</i>  | 0.74                               | 0.012          | 0.081                   |
| <i>Kcnf1</i>  | 0.91                               | 0.458          | 0.745                   |
| <i>Kcng1</i>  | -0.55                              | 0.765          | NA                      |
| <i>Kcng2</i>  | 0.15                               | 0.896          | 0.965                   |
| <i>Kcng3</i>  | -0.15                              | 0.970          | NA                      |
| <i>Kcng4</i>  | 0.40                               | 0.544          | 0.802                   |
| <i>Kcnh1</i>  | -3.74                              | 9.91E-8        | 8.24E-6                 |
| <i>Kcnh2</i>  | 0.11                               | 0.662          | 0.865                   |
| <i>Kcnh3</i>  | 0.31                               | 0.804          | 0.930                   |
| <i>Kcnh4</i>  | 0.43                               | 0.677          | 0.872                   |
| <i>Kcnh5</i>  | -1.92                              | 0.635          | NA                      |
| <i>Kcnh6</i>  | -7.06                              | 0.016          | 0.103                   |
| <i>Kcnh7</i>  | -7.17                              | 4.66E-6        | 1.69E-4                 |
| <i>Kcnh8</i>  | -4.92                              | 6.65E-4        | 0.009                   |
| <i>Kcnip1</i> | -0.13                              | 0.959          | NA                      |
| <i>Kcnip2</i> | -2.66                              | 0.036          | 0.175                   |
| <i>Kcnip3</i> | -1.07                              | 2.42E-4        | 0.004                   |

|               |       |       |       |
|---------------|-------|-------|-------|
| <i>Kcnip4</i> | -0.82 | 0.08  | 0.31  |
| <i>Kcns1</i>  | NA    | NA    | NA    |
| <i>Kcns2</i>  | -6.73 | 0.085 | 0.305 |
| <i>Kcns3</i>  | -0.57 | NA    | NA    |
| <i>Kcnv1</i>  | -1.11 | 0.085 | 0.306 |
| <i>Kcnv2</i>  | 1.73  | 0.009 | 0.067 |

**Supplementary Table S12.** Relative expression of voltage-gated large and small conductance calcium-activated potassium channel genes in *Myh11*<sup>ΔK/ΔK</sup> aortas. log<sub>2</sub> fold change = log<sub>2</sub> of relative expression normalized by expression in wild type aortas. Adjusted p-value = p-values adjusted for multiple testing, determined by the Benjamini and Hochberg method.

| Gene          | log <sub>2</sub> fold change | p-value | adjusted p-value |
|---------------|------------------------------|---------|------------------|
| <i>Kcnma1</i> | 0.13                         | 0.587   | 0.826            |
| <i>Kcnmb1</i> | 0.82                         | 0.001   | 0.009            |
| <i>Kcnmb2</i> | NA                           | NA      | NA               |
| <i>Kcnmb3</i> | NA                           | NA      | NA               |
| <i>Kcnmb4</i> | -8.28                        | 2.53E-9 | 4.55E-7          |
| <i>Kcnn1</i>  | -0.61                        | 0.021   | 0.122            |
| <i>Kcnn2</i>  | -4.76                        | 1.24E-5 | 3.75E-4          |
| <i>Kcnn3</i>  | -0.74                        | 0.035   | 0.172            |
| <i>Kcnn4</i>  | 0.03                         | 0.934   | 0.976            |
| <i>Kcnt1</i>  | -5.64                        | 3.48E-6 | 1.36E-4          |
| <i>Kcnt2</i>  | 0.18                         | 0.487   | 0.764            |
| <i>Kcnu1</i>  | -3.72                        | 0.009   | 0.068            |

**Supplementary Table S13.** Relative expression of genes involved in protease kinase G (PKG) pathway in *Myh11*<sup>ΔK/ΔK</sup> aortas. log<sub>2</sub> fold change = log<sub>2</sub> of relative expression normalized by expression in wild type aortas. Adjusted p-value = p-values adjusted for multiple testing, determined by the Benjamini and Hochberg method.

| Gene            | log <sub>2</sub> fold change | p-value | adjusted p-value |
|-----------------|------------------------------|---------|------------------|
| <i>Gucyl1a2</i> | 0.05                         | 0.859   | 0.952            |
| <i>Gucyl1a3</i> | -0.06                        | 0.763   | 0.912            |
| <i>Gucyl1b2</i> | -1.11                        | 0.785   | NA               |
| <i>Gucyl1b3</i> | 0.18                         | 0.342   | 0.653            |
| <i>Gucy2c</i>   | -0.05                        | 0.984   | NA               |
| <i>Gucy2d</i>   | -1.11                        | 0.785   | NA               |
| <i>Gucy2e</i>   | -3.74                        | 0.219   | NA               |
| <i>Gucy2f</i>   | -1.11                        | 0.785   | NA               |
| <i>Gucy2g</i>   | -0.33                        | 0.791   | 0.925            |
| <i>Guf1</i>     | 0.06                         | 0.724   | 0.894            |
| <i>Guk1</i>     | -0.27                        | 0.027   | 0.145            |

|              |      |         |         |
|--------------|------|---------|---------|
| <i>Prkg1</i> | 1.16 | 3.21E-9 | 5.36E-7 |
| <i>Prkg2</i> | 1.15 | 0.006   | 0.053   |

## **References**

1. Pannu H, *et al.* MYH11 mutations result in a distinct vascular pathology driven by insulin-like growth factor 1 and angiotensin II. *Human Molecular Genetics* **16**, 2453-2462 (2007).
2. Chung AWY, Au Yeung K, Sandor GGS, Judge DP, Dietz HC, Van Breemen C. Loss of Elastic Fiber Integrity and Reduction of Vascular Smooth Muscle Contraction Resulting From the Upregulated Activities of Matrix Metalloproteinase-2 and -9 in the Thoracic Aortic Aneurysm in Marfan Syndrome. *Circulation Research* **101**, 512-522 (2007).
